# Supplementary material
Source: Springer Nature journal article supplement (https://www.springermedizin.de/resource/supplementary/12916_2012_732_MOESM6_ESM.pdf/9598648)

## Men

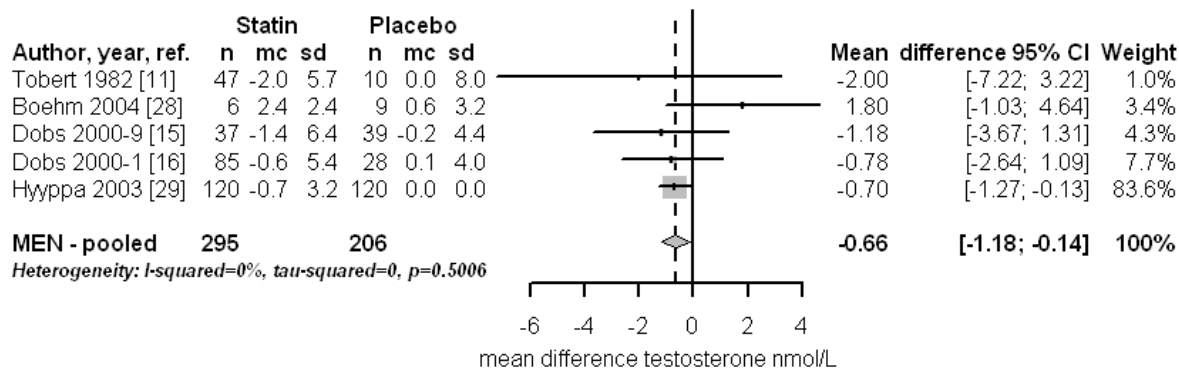

## Women

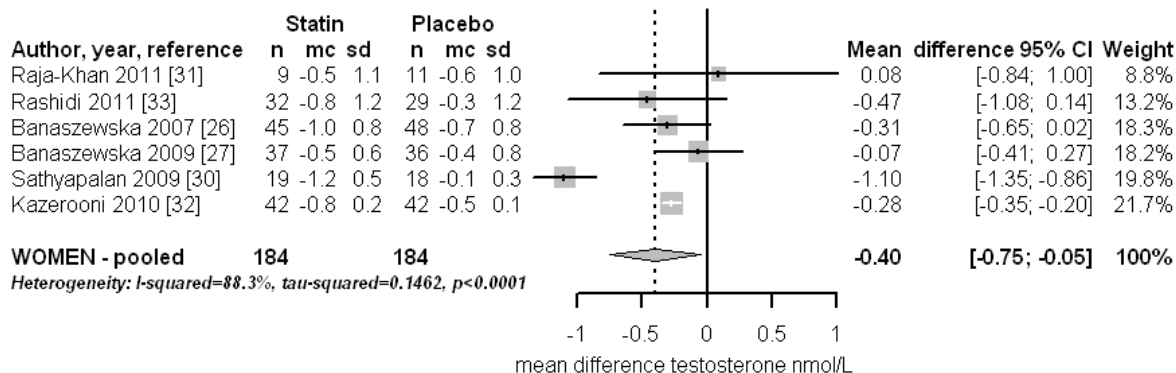

## All - men and women

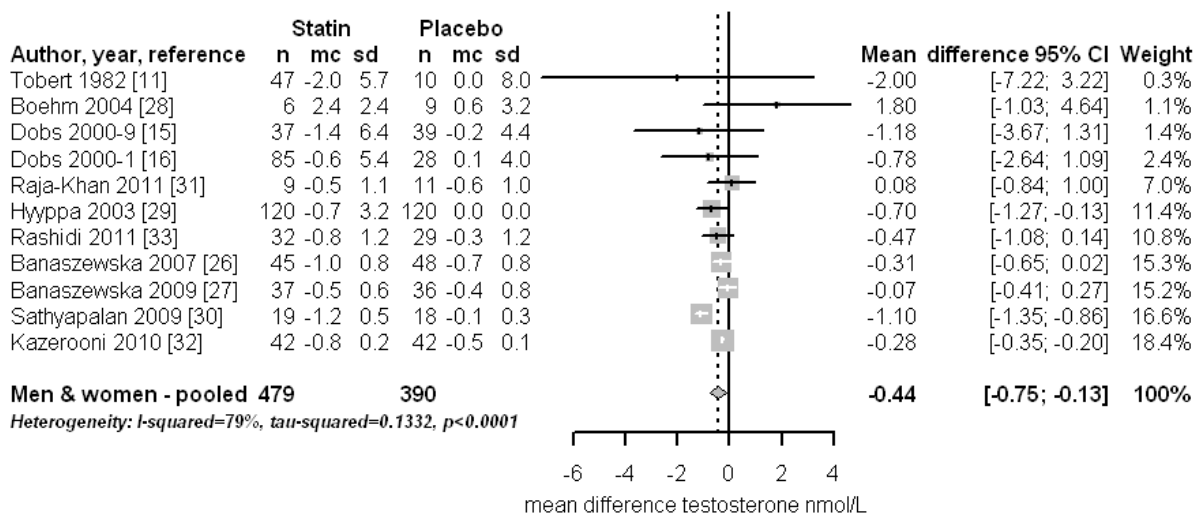

Supplement: MOESM6 [file 9598648]
